# Supplementary material for: Perspectives of Black Patients on Racism Within Emergency Care
Source: PubMed Central journal article supplement (PMC10924244; doi:10.1001/jamahealthforum.2024.0046), 2024-03-08
Supplement: jamahealthforum-e240046-s002.pdf [file jamahealthforum-e240046-s002.pdf]

## Data Sharing Statement

Agarwal. Perspectives of Black Patients on Racism Within Emergency Care. *JAMA Health Forum*. Published March 08, 2024. doi:10.1001/jamahealthforum.2024.0046

### Data

**Data available:** Yes

**Data types:** Deidentified participant data

**How to access data:** [anish.agarwal@pennmedicine.upenn.edu](mailto:anish.agarwal@pennmedicine.upenn.edu)

**When available:** With publication

### Supporting Documents

**Document types:** None

### Additional Information

**Who can access the data:** researchers whose proposed use of the data has been approved

**Types of analyses:** for a specified purpose

**Mechanisms of data availability:** after approval of a proposal
